# Supplementary material for: High Dependency Renal Unit (HDRU) for the management of COVID-19 in patients with severe acute or chronic kidney disease
Source: Research Square preprint supplement (doi:10.21203/rs.3.rs-235961/v2), 2021-08-06
Supplement: Supplementary file 1 [file 90ede478665bf5db8fbe8b9d.docx]

**Supplementary Figure 3: Proportional monthly mortality rate**

*Number of patients who expired or survived from amongst total patients cared for in a given month
