# Supplementary material for: High Dependency Renal Unit (HDRU) for the management of COVID-19 in patients with severe acute or chronic kidney disease
Source: Research Square preprint supplement (doi:10.21203/rs.3.rs-235961/v2), 2021-08-06
Supplement: Supplementary file 4 [file ea270c746e3338587b7bbcf0.docx]

**Supplementary Table 1: Hypoxia management for severe COVID-19**

| Maximal oxygen requirement during stay | AKI-D | ESRD |
| --- | --- | --- |
| Nasal prongs | 9 (7.6%) | 4 (3.9%) |
| Face Mask | 11 (9.5%) | 16 (13.6%) |
| Non-rebreathing mask | 23 (19.8%) | 30 (25.4%) |
| Non Invasive Ventilation | 22 (18.9%) | 16 (13.6%) |
| Invasive ventilation | 14 (12.1%) | 0 (0%) |
