# Supplementary figures and images for: High Dependency Renal Unit (HDRU) for the management of COVID-19 in patients with severe acute or chronic kidney disease
Source: Research Square preprint supplement (doi:10.21203/rs.3.rs-235961/v2), 2021-08-06

**Supplementary Figure 1: Kaplan-Meier survival curves for AKI-D in pre-HDRU and HDRU groups**


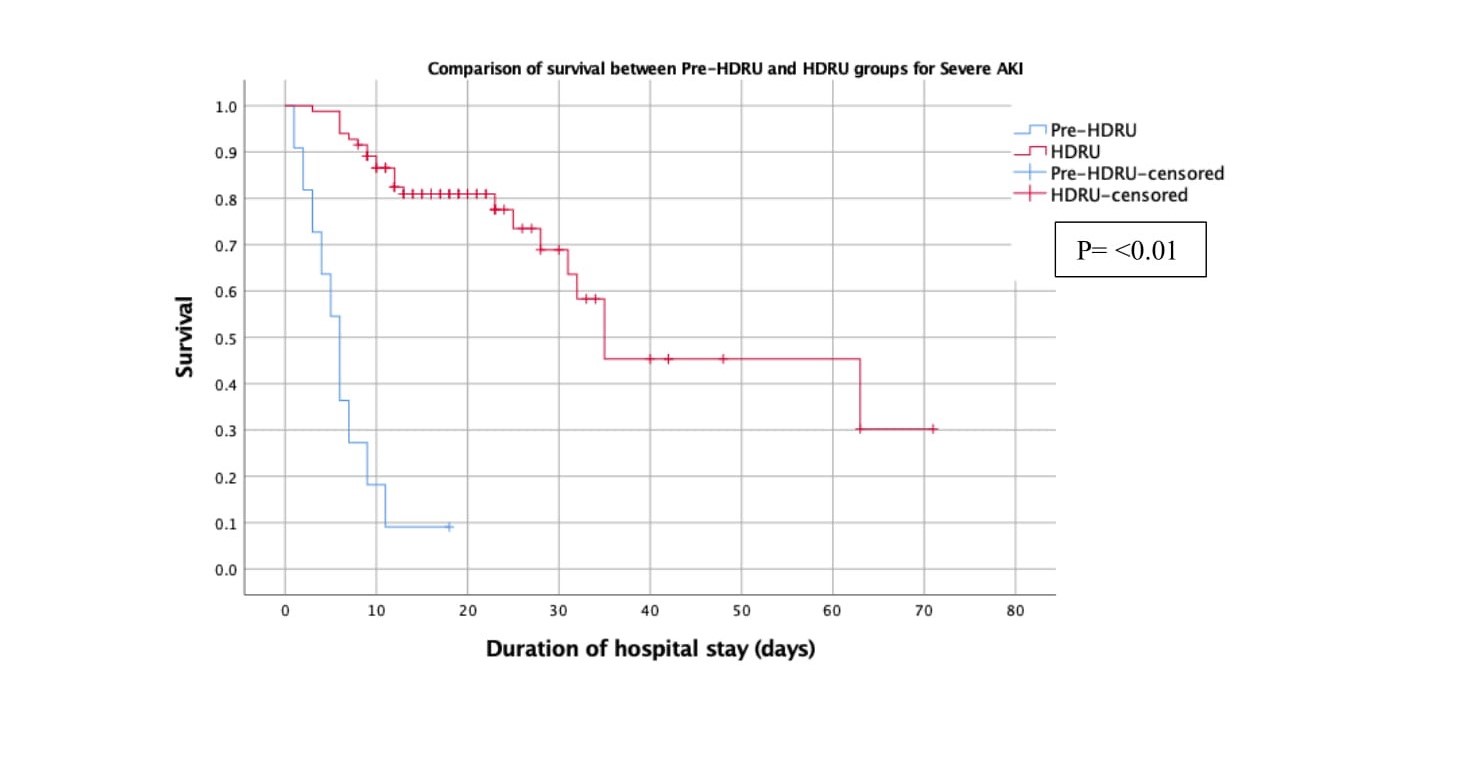

Supplement: Supplementary file 5 [file 03f5f71975a2070b6d8997b5.docx]

**Supplementary Figure 2: Kaplan-Meier survival curves for ESRD in pre-HDRU and HDRU groups**


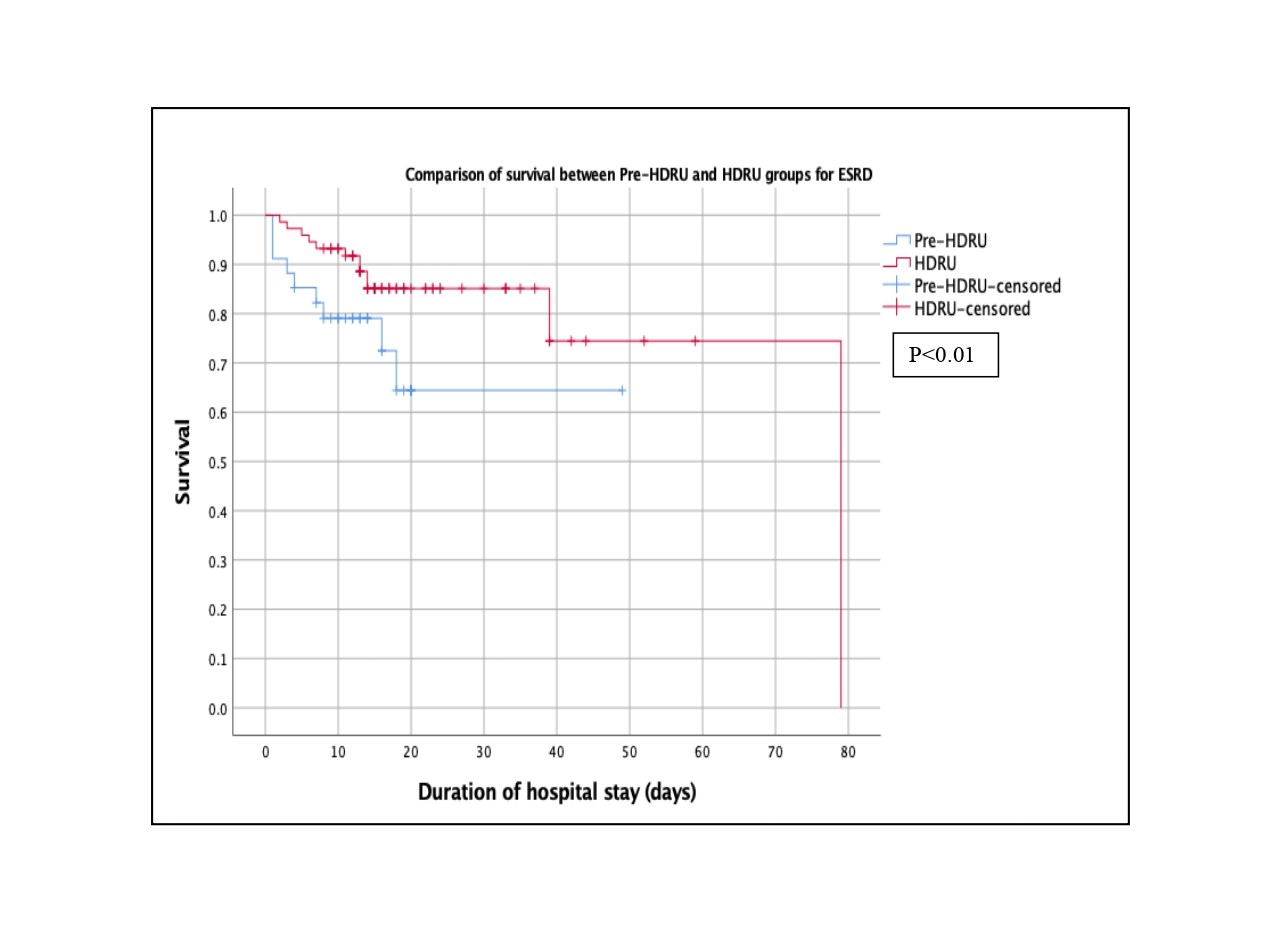

Supplement: Supplementary file 6 [file 1b8a67d26c2e44b25b960084.docx]
